# Supplementary material for: The Apical Complex Provides a Regulated Gateway for Secretion of Invasion Factors in Toxoplasma
Source: PubMed Central journal article supplement (PMC3990729; doi:10.1371/journal.ppat.1004074), 2014-04-17
Supplement: ppat.1004074.s002.pdf [file ppat.1004074.s002.pdf]

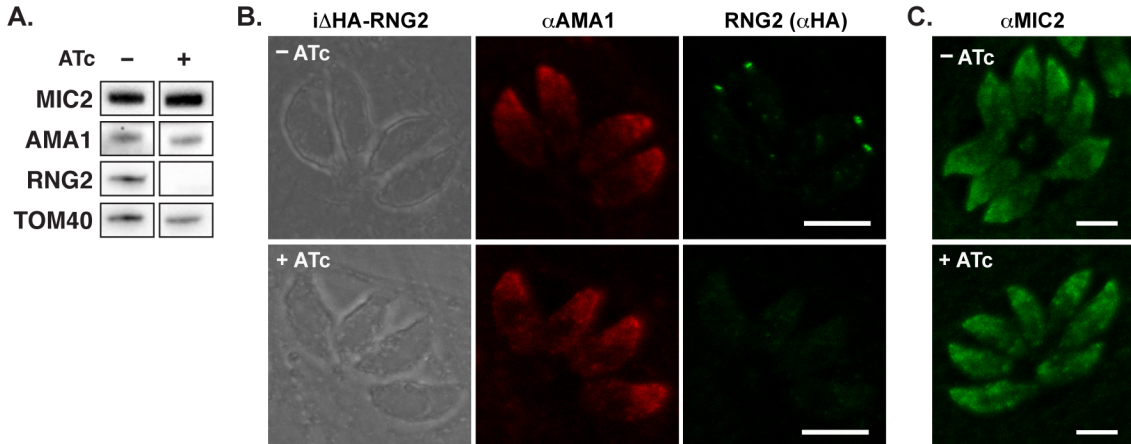

**Figure S2. Western blot and immunofluorescence assays for microneme maturity with RNG2 depletion.** (A) In parasite total protein samples, microneme proteins MIC2 and AMA1, and mitochondrial protein Tom40, show equivalent amounts of protein in i $\Delta$ HA-RNG2 cells treated with or without ATc for three days. Only HA-RNG2, detected by HA antibodies, shows depletion with ATc treatment. Equal cell numbers were used in all gel lanes. (B, C) IFA detection of (B) AMA1 and HA-RNG2, or (C) MIC2 in intracellular i $\Delta$ HA-RNG2 cells treated with or without ATc for two days. Scale bar = 5  $\mu$ m.
