# Supplementary material for: The Apical Complex Provides a Regulated Gateway for Secretion of Invasion Factors in Toxoplasma
Source: PubMed Central journal article supplement (PMC3990729; doi:10.1371/journal.ppat.1004074), 2014-04-17
Supplement: ppat.1004074.s004.pdf [file ppat.1004074.s004.pdf]

| Antibody                    | Dilution | Application  | Source                                                              |
|-----------------------------|----------|--------------|---------------------------------------------------------------------|
| Rat anti-HA                 | 1/100    | IFA          | Roche                                                               |
|                             | 1/1000   | Western blot |                                                                     |
| Mouse anti c-myc            | 1/200    | IFA          | Roche                                                               |
|                             | 1/500    | Western blot |                                                                     |
|                             | 1/200    | Western blot | Santa Cruz                                                          |
| Mouse anti-IMC1             | 1/500    | IFA          | Gary Ward (University of Vermont, USA)                              |
| Rabbit anti-GAP45           | 1/500    | IFA          | Dominique Soldati-Favre (University of Geneva, Switzerland)         |
| Rabbit anti-Centrin1        | 1/500    | IFA          | Abcam                                                               |
| Mouse anti-tubulin          | 1/100    | IFA          | mAb 12G10, Developmental Studies Hybridoma Bank, University of Iowa |
| Mouse anti-MIC2 clone 6D10  | 1/1000   | Western blot | David Sibley (Washington University, USA)                           |
| Mouse anti-AMA1 clone B3.93 | 1/1000   | Western blot | Chris Tonkin (WEHI, Australia)                                      |
| Rabbit anti-Tom40           | 1/1000   | Western blot | Giel van Dooren (Australian National University, Australia)         |
| Mouse anti-ROP1             | 1/1000   | IFA          | John Boothroyd (Stanford University, USA)                           |
| Mouse anti-SAG1             | 1/1000   | IFA          | Abcam                                                               |
| Mouse anti-GFP              | 1/500    | Western blot | Roche                                                               |
| Mouse anti-GRA8             | 1/500    | Western blot | Gary Ward (University of Vermont, USA)                              |
| Mouse anti-AMA1 CL.22       | 1/500    | Western blot | Chris Tonkin (WEHI, Australia)                                      |

Table S1: Antibodies used for microscopy and protein assays
